# Supplementary material for: Organoboron flank-substituted donor–acceptor polymer anode with ultra-long cycling stability for lithium ion batteries
Source: Royal Society of Chemistry journal article supplement (doi:10.1039/d3cp05634a), 2024-01-01
Supplement: d3cp05634a1.pdf [file d3cp05634a1.pdf]

# Supporting Information

## **Organoboron Flank-substituted Donor-Acceptor Polymer Anode with Ultra-long Cycling Stability for Lithium-Ion Batteries**

**Hao Zhao<sup>a,\*</sup>, Ting Liu<sup>a</sup>, Wenjing Zhang<sup>a</sup>, Jiadong Wang<sup>a</sup>, Kexuan Li<sup>a</sup>, Yitong  
Zhou<sup>a</sup>, Luzun Liu<sup>a</sup>, Yunfei Bai<sup>c</sup>, Xiaobo Pan<sup>b,c,\*</sup>**

<sup>a</sup> School of Physics and Electronic Information, Yantai University, Yantai 264005,  
People's Republic of China.

<sup>b</sup> New Energy (Photovoltaic) Industry Research Center, Qinghai University, Xining  
810006, People's Republic of China.

<sup>c</sup> State Key Laboratory of Applied Organic Chemistry (Lanzhou University), Key  
Laboratory of Nonferrous Metal Chemistry and Resources Utilization of Gansu  
Province, College of Chemistry and Chemical Engineering, Lanzhou University,  
Lanzhou 730000 (P.R. China).

## Instrumentation / General Methods

Part of the reactions and manipulations were carried out under an argon atmosphere by using standard Schlenk techniques or an inter-atmosphere glovebox. Prior to use, all the solvents were dried by refluxing with sodium and benzophenone and degassed by applying three freeze-pump-thaw cycles. Dichloromethane was dried by refluxing with phosphorus pentoxide for more than 5 hours. Chloroform-d was dried by using a 4 Å molecular sieve (2-3 days). All chemicals (reagents and solvents) were obtained from commercial suppliers (Energy Chemical, Heowns) and directly used without further purification. 2,5-diiodothiophene and (2,5-diethynyl-1,4-phenylene)bis(dimesitylborane) were synthesized according to literature previously reported procedures.

NEWARE battery cycler (CT-4008T-5V10mA-164, Shenzhen, China) testing systems were used for galvanostatic charge/discharge experiments. Cyclic voltammetry (CV) analyses were performed with a Wuhan Corrtest CS310M workstation. Structure optimization at the level of b3lyp/6-31G and single point energy calculation at the level of b3lyp/def2-SVP were carried out on the ORCA 5.0.1 software package provided by Lanzhou University Supercomputing Centre. Molecular electro-static potential and molecular dipole moment were calculated by Multiwfn3.8(dev) on a personal computer.

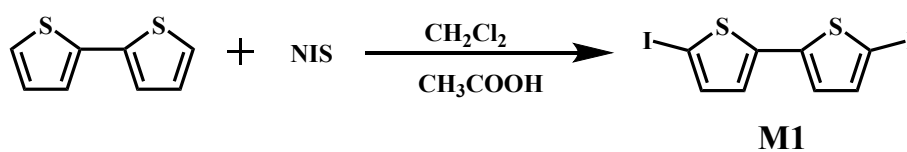

**Scheme S1.** Synthetic route of monomer **M1**.<sup>[S1]</sup>

**Synthesis of 5,5'-diiodo-2,2'-bithiophene (M1):** 2,2'-Bithiophene (1.663 g, 10 mmol) and N-iodosuccinimide (4.95 g, 22 mmol) were dissolved in a mixture of 20 mL dichloromethane and 20 mL glacial acetic acid and stirred at room temperature for 4 h. After the reaction, the solid was filtered and washed with methanol to give a pure light pink solid (yield: 4.01 g, 96 %). <sup>1</sup>H NMR (400 MHz, CDCl<sub>3</sub>): δ 7.15 (d, 2H), 6.79 (d, 2H).

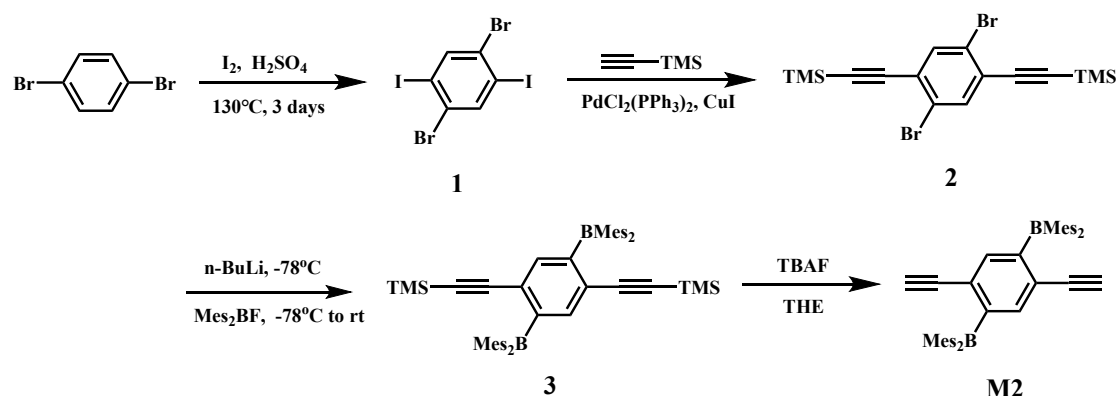

**Scheme S2.** Synthetic route of monomer **M2**. [S1]

**1, 4-dibromo-2, 5-diiodobenzene (compound 1):** Weigh 1,4-dibromobenzene (23.59 g, 100 mmol) in a 500 mL flask, add 300 mL of concentrated sulphuric acid and slowly add iodine monomers (55.836 g, 220 mmol) to the above reaction solution, heat the mixture to 130°C and stir at reflux for 3 d. During the reaction, the reaction solution was shaken manually every 2-3 h to dissolve the sublimated iodine monomers. At the end of the reaction, the reaction solution is cooled to room temperature. The mixture was slowly poured into a 350 mL ice-water mixture with concentrated sulfuric acid in small amounts, and then extracted with dichloromethane ( $3 \times 150$  mL). The organic phase was separated by removing excess iodine monomers with 300 mL of aqueous sodium hydroxide, and the organic phase was extracted again with dichloromethane ( $3 \times 50$  mL), the organic layers were combined, dried with anhydrous magnesium sulfate, filtered, and the organic phase was removed by rotary evaporator and recrystallized with hot dichloromethane/methanol solvent mixture to obtain a white compound **1** (yield: 85 %, 41.45 g).  $^1\text{H NMR}$  (400 MHz,  $\text{CDCl}_3$ ):  $\delta$  8.05 (s, 2H).

**Synthesis of 1, 4-dibromo-2, 5-ditrimethylsilylacetylene benzene (compound 2):** Under an  $\text{N}_2$  atmosphere, compound **1** (19.508 g, 40 mmol), catalyst bis(triphenylphosphine)palladium dichloride (1.404 g, 2 mmol), and cuprous iodide (0.762 g, 4 mmol) in 200 mL of degassed toluene and 100 mL of degassed diisopropylamine, and add trimethylsilyl acetylene (8.25 g, 84 mmol) to the above

reaction mixture, stirred at room temperature for 24 h. After the reaction, 150 mL of water was added and extracted with dichloromethane (3 × 50 mL), combined with the organic phase, dried with anhydrous magnesium sulfate, filtered, spun off the solvent by rotary evaporator, and purified by column chromatography using hexane as eluent to obtain a light yellow solid (yield: 11.26 g, 66 %). <sup>1</sup>H NMR (400 MHz, CDCl<sub>3</sub>): δ 7.67 (s, 2H), 0.27 (s, 18H).

**Synthesis of compound 3:** Under an N<sub>2</sub> atmosphere, Compound 2 (12.849 g, 30 mmol) was dissolved in 240 mL of dry tetrahydrofuran at -78 °C, and n-butyl (1.6 M, 63 mmol, 39.4 mL) was added dropwise and reacted at this temperature for about 2 h. Then Mes<sub>2</sub>BF (16.895 g, 63 mmol) was dissolved in 30 mL of tetrahydrofuran and transferred dropwise to the the above reaction solution. After that, the reaction system was slowly brought to room temperature and reacted overnight. After the reaction, 100 mL of water was added to quench the reaction, extracted with dichloromethane (3 × 50 mL), combined with the organic phase, dried with anhydrous magnesium sulfate, spun off the solvent, added hexane, and filtered under reduced pressure to obtain a white solid (yield: 14.95 g, 65 %). <sup>1</sup>H NMR (400 MHz, CDCl<sub>3</sub>): δ 7.34 (s, 2H), 6.75 (s, 8H), 2.27 (s, 12H), 1.99 (s, 24H), -0.06 (s, 18H).

**Synthesis of (2,5-diethynyl-1,4-phenylene)bis(dimesitylborane) (M2):** Compound 3 (11.503 g, 15 mmol) was dissolved in 150 mL of tetrahydrofuran and tetrabutylammonium fluoride (1 M, 150 mmol) was added to the above solution and stirred at room temperature for 6 d. After the reaction, most of the solvent was spun off, followed by dilution with 100 mL of water, extraction with dichloromethane (3 × 50 mL), combining the organic phase, drying with anhydrous magnesium sulfate, and spinning off the solvent. Purified by column chromatography (dichloromethane: petroleum ether = 1: 20) to afford a white solid (yield: 6.349 g, 68 %) <sup>1</sup>H NMR (400 MHz, CDCl<sub>3</sub>): δ 7.39 (s, 2H), 6.75 (s, 8H), 2.74 (s, 2H), 2.27 (s, 12H), 2.00 (s, 24H).

## Synthesis of polymers PBT-2

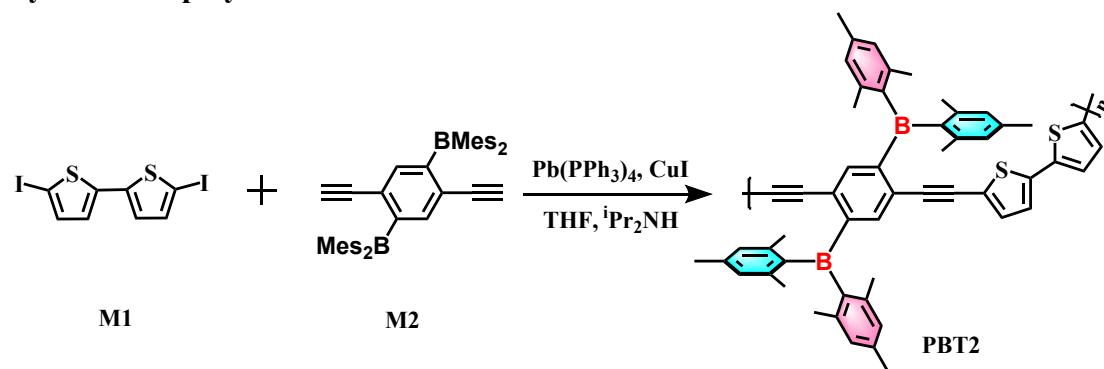

Scheme S3. Synthesis route of PBT-2. <sup>[S1]</sup>

**Synthesis of PBT-2:** Under an  $\text{N}_2$  atmosphere, Monomer **M1** (0.336 g, 1 mmol), **M2** (0.622 g, 1 mmol), catalyst tetrakis(triphenylphosphine)palladium (0.577 g, 0.05 mmol), and cuprous iodide (0.019 g, 0.1 mmol) were dissolved in a degassed mixture of 30 mL tetrahydrofuran and 10 mL diisopropylamine, heated to 70 °C, and stirred. After 48 h, the reaction was completed and cooled to room temperature. The reaction mixture was filtered under reduced pressure to remove a small amount of insoluble material and catalyst, and the filtrate was concentrated and precipitated by repeatedly dissolving in precipitant methanol and hexane in sequence until the supernatant was essentially colorless, centrifuged and dried in a vacuum oven at 60 °C for 24 h to obtain a yellow polymer solid (yield: 520 mg, 74 %).  $^1\text{H}$  NMR (400 MHz,  $\text{CDCl}_3$ ):  $\delta$  7.40 (s, 2H), 6.76 (s, 8H), 6.52 (s, 2H), 2.24 (s, 12H), 2.02 (s, 24H).  $^{11}\text{B}$  NMR (128.3 MHz,  $\text{CDCl}_3$ ):  $\delta$  (ppm): 70.27. GPC:  $M_n = 13091$ ,  $M_w = 19559$ , PDI = 1.49.

### Electrochemical measurements

Electrochemical characterization was conducted on CR2032-type coin cells using a piece of metallic Li foil as the reference electrode. The anode was composed of 50 wt% active material, 40 wt% active carbon, and 10 wt% sodium alginate. The electrode plate is a copper circle with a radius of 6 mm, and after loading 300  $\mu\text{m}$  thick slurry on one face, the single electrode active material loading was around 1.1 mg. Average loading mass of the active material was  $1 \pm 0.2 \text{ mg cm}^{-2}$ . Every electrode weighing was calculated as the difference in mass from the blank circle. The cathode and anode were separated by a glass fiber filter (Whatman GF/C).

[S1] Q. Wei, X. Yao, Q. Zhang, P. Yan, C. Ru, C. Li, C. Tao, W. Wang, D. Han, D. Han, L. Niu, D. Qin and X. Pan, *Small*, 2021, **17**, 2100132.

### Characterization of polymer

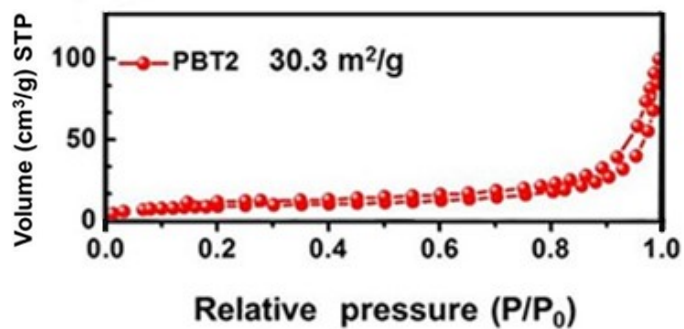

Figure S1. Nitrogen adsorption isotherms depicting the porosity of **PBT-2**.

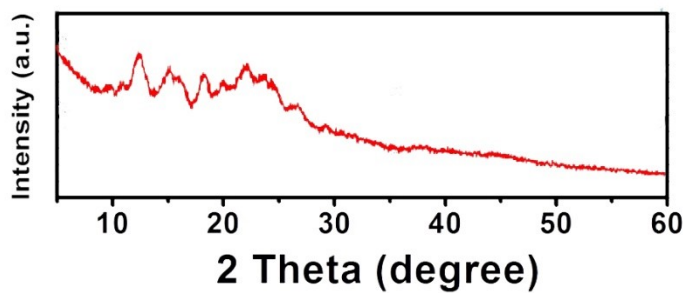

Figure S2. XRD pattern of **PBT-2**.

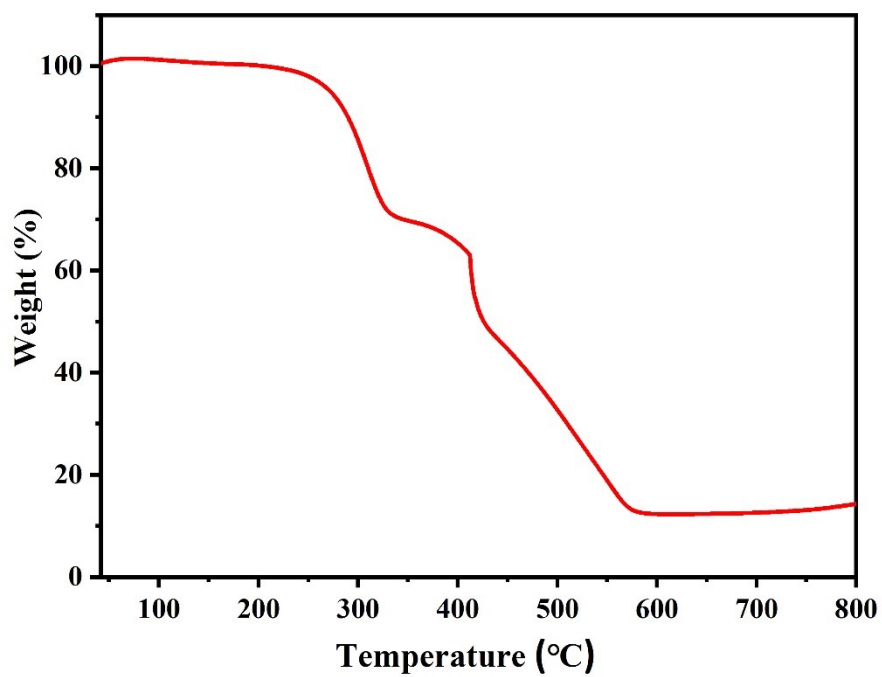

Figure S3. Thermogravimetric analysis curve of PBT-2.

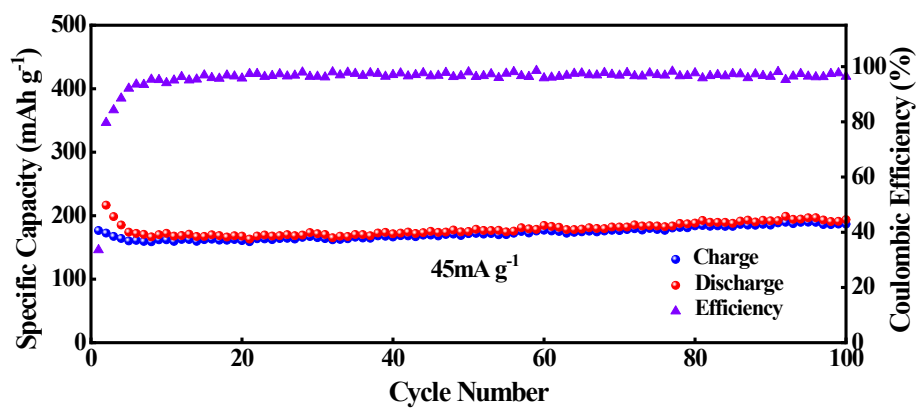

Figure S4. Detailed cyclic test data of the first 100 cycles at 45 mA g<sup>-1</sup>.

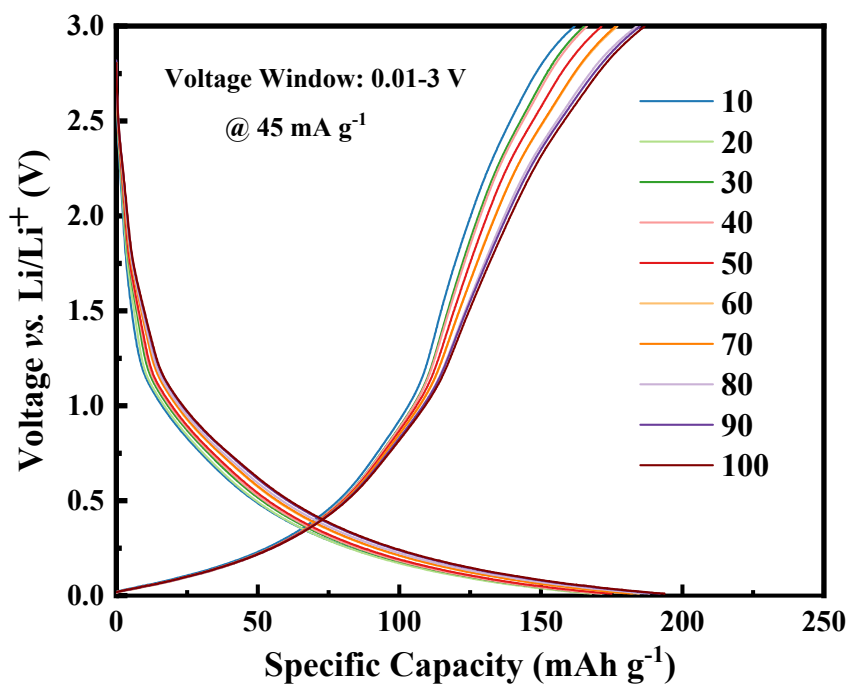

Figure S5. Charge and discharge curves of the first 100 cycles at 45 mA g<sup>-1</sup>.

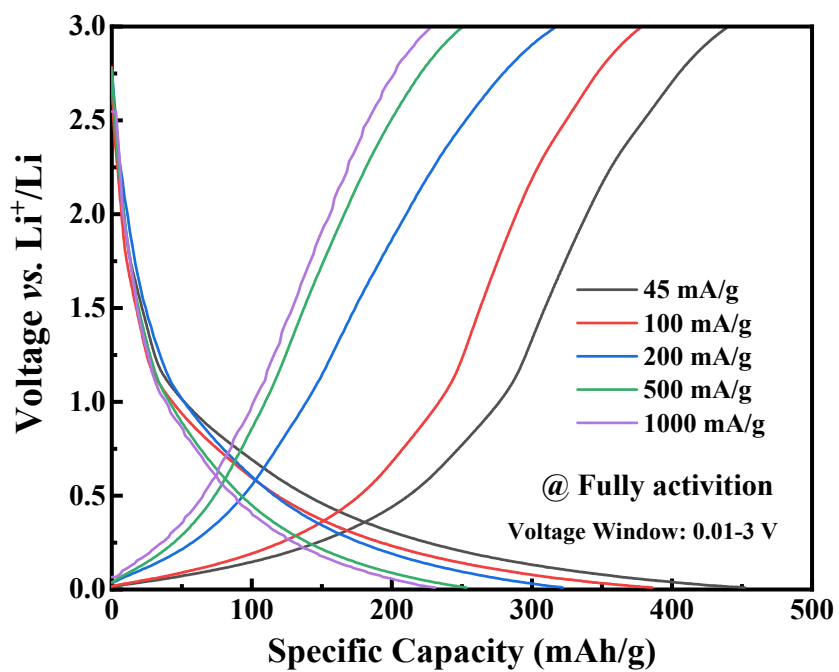

Figure S6. Charge and discharge curves of fully activated cell.



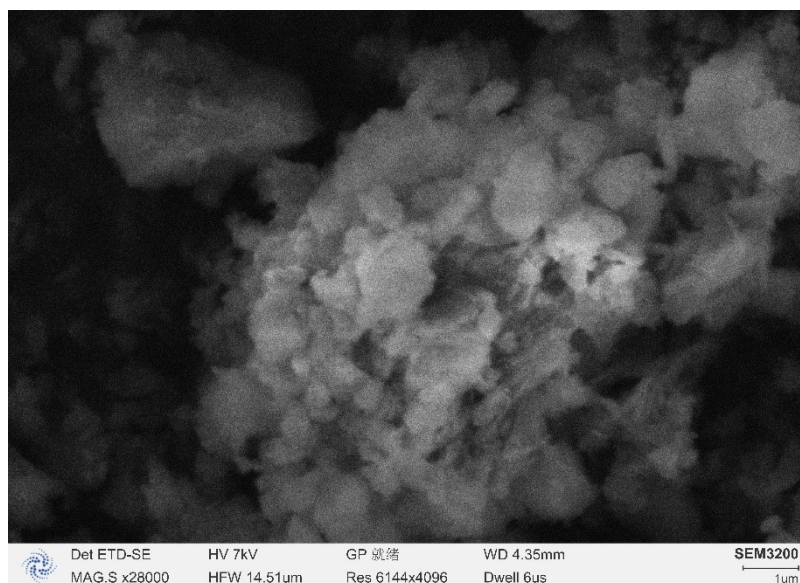

Figure S7. SEM of electrode after 10000 cycles at 1 A g<sup>-1</sup>.

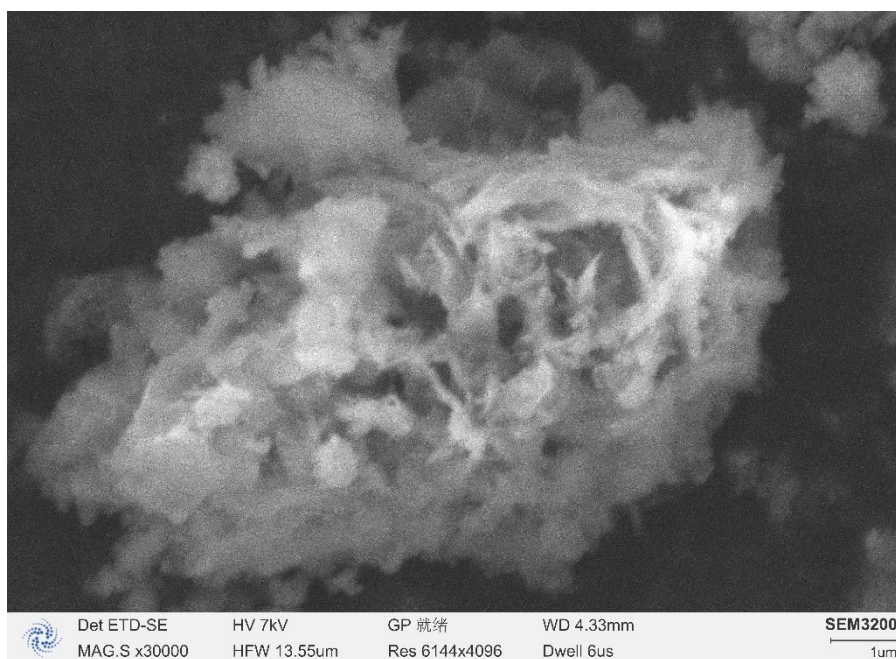

Figure S8. SEM of electrode after 10000 cycles at 1 A g<sup>-1</sup>.

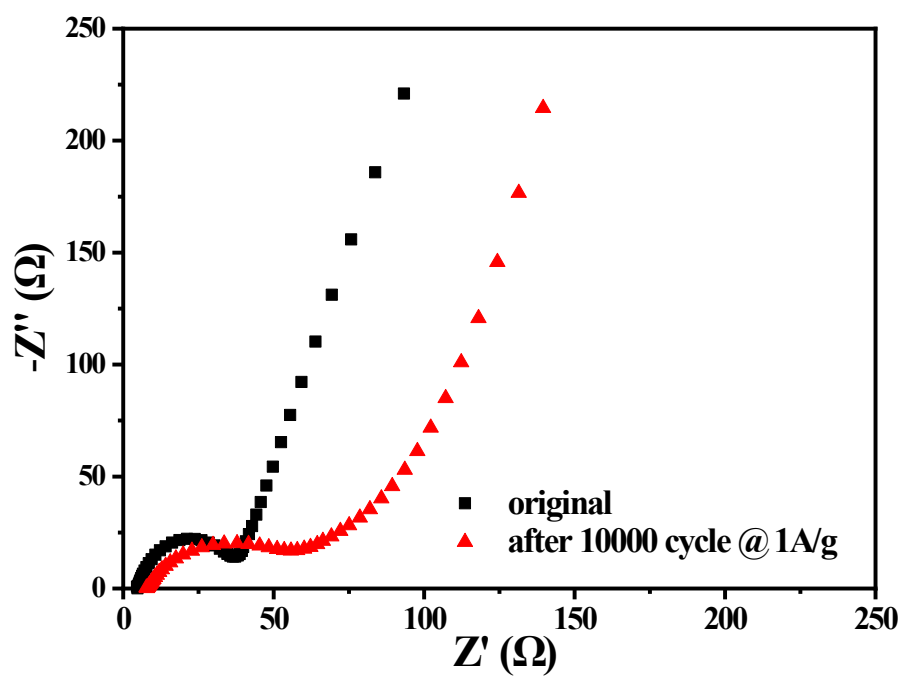

Figure S9. Nyquist plots of electrodes before and after cycling.

## Cartesian coordinates for the optimized geometries

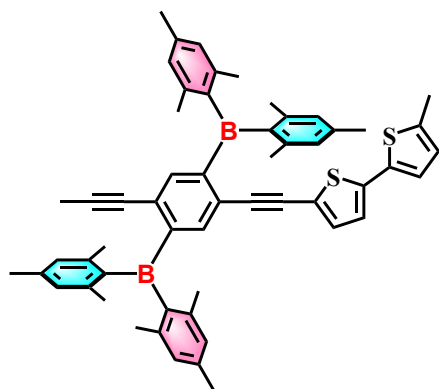

Coordinates from ORCA-b3lyp/6-31G

| Row | Symbol | X        | Y        | Z        |
|-----|--------|----------|----------|----------|
| 1   | C      | -0.51755 | -1.39676 | -0.51833 |
| 2   | C      | -1.30345 | -0.20371 | -0.47775 |
| 3   | C      | -0.61594 | 1.021327 | -0.53035 |
| 4   | C      | 0.79462  | 1.120777 | -0.53139 |
| 5   | C      | 1.58188  | -0.07301 | -0.52549 |
| 6   | C      | 0.888904 | -1.29716 | -0.56455 |
| 7   | C      | 1.36408  | 2.423338 | -0.61    |
| 8   | C      | -1.1138  | -2.69571 | -0.57603 |
| 9   | B      | 3.158401 | -0.11586 | -0.43463 |
| 10  | C      | 1.747469 | 3.581476 | -0.72291 |
| 11  | C      | -1.58652 | -3.81612 | -0.64839 |
| 12  | C      | -2.19463 | -5.14183 | -0.70196 |
| 13  | C      | 2.171677 | 4.904871 | -0.86201 |
| 14  | C      | 1.413018 | 6.055739 | -0.96119 |
| 15  | C      | 2.158943 | 7.253365 | -1.11817 |
| 16  | C      | 3.528816 | 7.086768 | -1.14963 |
| 17  | S      | 3.95344  | 5.323952 | -0.96116 |
| 18  | C      | 5.930018 | 7.906772 | -1.37554 |
| 19  | C      | 6.669535 | 9.122663 | -1.52507 |
| 20  | C      | 5.910634 | 10.26035 | -1.56762 |
| 21  | S      | 4.144807 | 9.846487 | -1.41198 |
| 22  | C      | 4.566022 | 8.068156 | -1.29675 |
| 23  | C      | 6.340983 | 11.68458 | -1.71591 |
| 24  | B      | -2.87785 | -0.16992 | -0.34401 |
| 25  | C      | 5.938817 | -4.22653 | -3.72863 |
| 26  | C      | 6.102005 | 3.505043 | 3.263318 |
| 27  | C      | 5.576178 | 1.520808 | -1.32588 |
| 28  | C      | 2.363224 | 0.231555 | 2.511348 |
| 29  | C      | -2.57139 | 0.062165 | -3.36678 |
| 30  | C      | -5.77842 | 3.9357   | -3.54051 |
| 31  | C      | -4.78204 | 1.860619 | 0.934524 |
| 32  | C      | -5.23959 | -1.8874  | -1.21669 |

|    |   |          |          |          |
|----|---|----------|----------|----------|
| 33 | C | -2.05118 | -0.48602 | 2.59189  |
| 34 | C | -5.69777 | -3.85317 | 3.393042 |
| 35 | C | -3.65494 | 0.92048  | -1.18684 |
| 36 | C | -3.48023 | 1.009143 | -2.59966 |
| 37 | C | -4.17464 | 1.979372 | -3.33731 |
| 38 | C | -5.0286  | 2.905203 | -2.72537 |
| 39 | C | -5.18631 | 2.830298 | -1.33516 |
| 40 | C | -4.53598 | 1.855287 | -0.56444 |
| 41 | C | 2.793073 | -0.30671 | -3.45185 |
| 42 | C | 5.051208 | -2.18571 | 0.786133 |
| 43 | C | 3.90343  | -1.20692 | -1.30514 |
| 44 | C | 3.702372 | -1.27647 | -2.71487 |
| 45 | C | 4.36904  | -2.24821 | -3.47581 |
| 46 | C | 5.21926  | -3.19373 | -2.88932 |
| 47 | C | 5.402003 | -3.13765 | -1.50113 |
| 48 | C | 4.780034 | -2.16187 | -0.70837 |
| 49 | C | -3.62173 | -1.14667 | 0.649756 |
| 50 | C | -4.73434 | -1.92866 | 0.214683 |
| 51 | C | -5.38093 | -2.79481 | 1.108424 |
| 52 | C | -4.98946 | -2.90604 | 2.449564 |
| 53 | C | -3.91167 | -2.12409 | 2.880719 |
| 54 | C | -3.21616 | -1.27011 | 2.01123  |
| 55 | C | 3.932983 | 0.844405 | 0.547904 |
| 56 | C | 5.071825 | 1.586268 | 0.105308 |
| 57 | C | 5.74849  | 2.4347   | 0.991963 |
| 58 | C | 5.362988 | 2.569499 | 2.332848 |
| 59 | C | 4.264322 | 1.823784 | 2.773067 |
| 60 | C | 3.539235 | 0.985577 | 1.91218  |
| 61 | H | -1.19158 | 1.941181 | -0.56569 |
| 62 | H | 1.462114 | -2.21716 | -0.62387 |
| 63 | H | -1.6419  | -5.86264 | -0.08626 |
| 64 | H | -3.22772 | -5.11193 | -0.33369 |
| 65 | H | -2.21704 | -5.53559 | -1.7265  |
| 66 | H | 0.330902 | 6.027539 | -0.92583 |
| 67 | H | 1.693127 | 8.22734  | -1.21235 |
| 68 | H | 6.401457 | 6.9318   | -1.33173 |
| 69 | H | 7.750846 | 9.148812 | -1.60166 |
| 70 | H | 5.920057 | 12.14945 | -2.61667 |
| 71 | H | 6.035738 | 12.29761 | -0.85825 |
| 72 | H | 7.4326   | 11.73479 | -1.79189 |
| 73 | H | 6.95866  | -3.89937 | -3.97579 |
| 74 | H | 6.025814 | -5.18263 | -3.19979 |
| 75 | H | 5.416528 | -4.40814 | -4.67428 |
| 76 | H | 5.839914 | 4.552424 | 3.059629 |
| 77 | H | 5.858192 | 3.302341 | 4.311516 |
| 78 | H | 7.18858  | 3.415485 | 3.143791 |
| 79 | H | 4.79303  | 1.772474 | -2.05087 |

|     |   |          |          |          |
|-----|---|----------|----------|----------|
| 80  | H | 6.395773 | 2.231469 | -1.47441 |
| 81  | H | 5.944199 | 0.522361 | -1.58307 |
| 82  | H | 2.413034 | 0.257784 | 3.605126 |
| 83  | H | 1.405913 | 0.675476 | 2.21441  |
| 84  | H | 2.335024 | -0.81982 | 2.206897 |
| 85  | H | -2.84602 | 0.044035 | -4.42708 |
| 86  | H | -1.52194 | 0.375005 | -3.30247 |
| 87  | H | -2.61909 | -0.96639 | -2.99492 |
| 88  | H | -6.78782 | 3.583806 | -3.79647 |
| 89  | H | -5.8942  | 4.875734 | -2.98912 |
| 90  | H | -5.26163 | 4.155256 | -4.48117 |
| 91  | H | -5.42922 | 2.698651 | 1.213405 |
| 92  | H | -5.26289 | 0.93606  | 1.269904 |
| 93  | H | -3.8518  | 1.962329 | 1.507119 |
| 94  | H | -4.45025 | -2.13658 | -1.93637 |
| 95  | H | -6.05119 | -2.60907 | -1.35811 |
| 96  | H | -5.61947 | -0.89678 | -1.48639 |
| 97  | H | -2.0868  | -0.50378 | 3.686402 |
| 98  | H | -1.08894 | -0.91325 | 2.28561  |
| 99  | H | -2.04773 | 0.563065 | 2.278362 |
| 100 | H | -5.2878  | -4.87052 | 3.319653 |
| 101 | H | -5.59047 | -3.53433 | 4.435534 |
| 102 | H | -6.76814 | -3.91923 | 3.166409 |
| 103 | H | -4.04078 | 2.01446  | -4.41634 |
| 104 | H | -5.8371  | 3.544919 | -0.83615 |
| 105 | H | 3.035136 | -0.2909  | -4.52002 |
| 106 | H | 1.738981 | -0.59484 | -3.3555  |
| 107 | H | 2.87721  | 0.719617 | -3.07958 |
| 108 | H | 5.688466 | -3.03724 | 1.046499 |
| 109 | H | 5.553131 | -1.27238 | 1.121584 |
| 110 | H | 4.128775 | -2.27648 | 1.373285 |
| 111 | H | 4.216323 | -2.26859 | -4.55272 |
| 112 | H | 6.049969 | -3.86806 | -1.0216  |
| 113 | H | -6.22085 | -3.38645 | 0.750272 |
| 114 | H | -3.59904 | -2.18049 | 3.921095 |
| 115 | H | 6.601063 | 3.002256 | 0.62617  |
| 116 | H | 3.957251 | 1.897927 | 3.813828 |
